# Supplementary material for: Comprehensive analysis reveals immunosuppressive part of SSRP1 in pan-cancer and its potential funtion in pancreatic cancer
Source: Research Square preprint supplement (doi:10.21203/rs.3.rs-6927777/v1), 2025-07-28
Supplement: Supplementary file 1 [file 41de7ce87b0113eff6f0f0a3.docx]

**Table2 The siRNAs used in the study**

| siRNA | sense(5’-3’) | antisense(5’-3’) |
| --- | --- | --- |
| Control siRNA | UUCUCCGAACGUGUCACGUTT | ACGUGACACGUUCGGAGAATT |
| SSRP1-si1 | GCCAUGUCUACAAGUAUGATT | UCAUACUUGUAGACAUGGCTT |
| SSRP1-si2 | CCCAGAAUGGUGUUGUCAAATT | UUUGACAACACAUUCUGGGTT |
| SSRP1-si3 | GGCACUCAGUAUACCUUCATT | UGAAGGUAUACUGAGUGCCTT |
